# Supplementary figures and images for: Visible light-initiated cross-coupling between thiophenols and aryl halides (X = I and Br) to synthesize aryl thioethers over Pd/ZnIn2S4
Source: Royal Society of Chemistry journal article supplement (doi:10.1039/d2cy01875f), 2023-01-01

### Supplementary Information

**Fig. S1** The SEM image of  $\text{ZnIn}_2\text{S}_4$ .

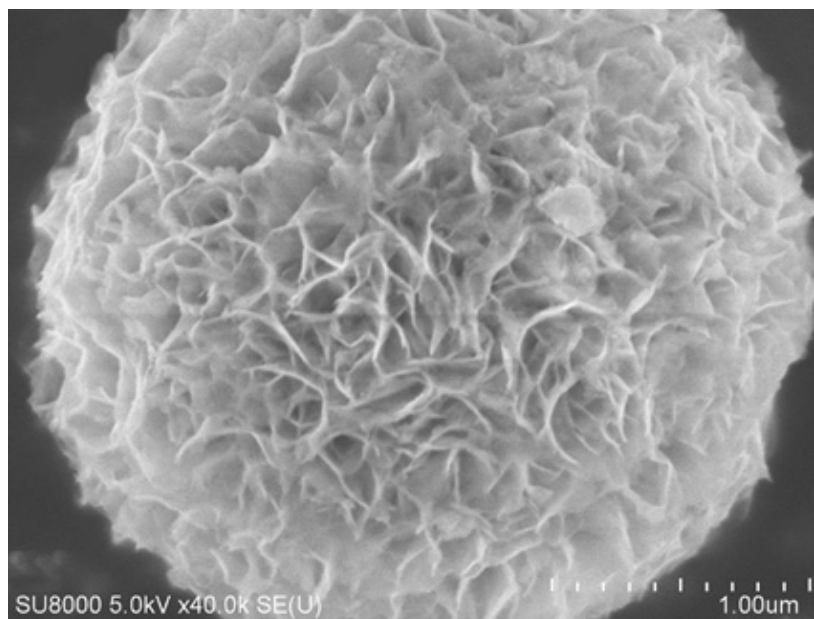

Supplement: d2cy01875f1.pdf [file d2cy01875f1.pdf]
